# Supplementary material
Source: publisher site journal article supplement (https://www.degruyterbrill.com/publication/isbn/9783110938722/downloadAsset/9783110938722_Contents--en.pdf)
Supplement: Supplementary file 1 [file 9783110938722_Contents--en.pdf]

## **Inhalt**

|                                                  |     |
|--------------------------------------------------|-----|
| <b>Einleitung</b>                                | 9   |
| <b>1. Zur Biographie</b>                         | 27  |
| 1.1 Schulzeit in Chemnitz                        | 29  |
| 1.2 Studium in Leipzig                           | 36  |
| 1.3 Copist in Dresden                            | 54  |
| 1.4 Die Zeit des Siebenjährigen Krieges          | 69  |
| 1.5 Professor in Göttingen                       | 92  |
| <b>2. Die Erklärung der Dichter</b>              | 107 |
| 2.1 Heynes Lehrtätigkeit                         | 108 |
| 2.2 Ethik und Ästhetik                           | 113 |
| 2.3 Die Vergil Ausgabe                           | 123 |
| <b>3. Die „Allgemeine Weltgeschichte“</b>        | 149 |
| 3.1 Umfang und Ziel der Überarbeitung            | 150 |
| 3.2 Heynes Zusätze und Kommentare                | 157 |
| 3.3 Eigene Ausarbeitungen                        | 170 |
| 3.3.1 Die griechische Frühgeschichte             | 175 |
| 3.3.2 Die Kelten                                 | 180 |
| 3.4 Über den Nutzen des Geschichtsstudiums       | 183 |
| <b>4. Die Universitätsprogramme</b>              | 187 |
| 4.1 Übersicht                                    | 188 |
| 4.2 Die politischen Grundsätze                   | 197 |
| 4.2.1 Das Ideal der Freiheit                     | 197 |
| 4.2.2 Das Ideal der Frugalität                   | 202 |
| 4.3 Die Gesetzgeber Großgriechenlands            | 210 |
| 4.4 Die Programme zur Französischen Revolution   | 220 |
| 4.5 Über einige späte lateinische Schriftsteller | 253 |

|                                                                   |     |
|-------------------------------------------------------------------|-----|
| <b>5. Die Rezensionen in den Göttingischen gelehrten Anzeigen</b> | 263 |
| 5.1 Übersicht                                                     | 263 |
| 5.2 Heynes Rezensionen zur Alten Geschichte                       | 292 |
| 5.2.1 Geschichte und Alterthümer (I)                              | 294 |
| 5.2.2 Geschichte und Alterthümer (II)                             | 310 |
| 5.2.3 Die antiken Historiker                                      | 326 |
| 5.2.4 Das Ideal der Geschichtsschreibung                          | 347 |
| 5.2.5 Die griechische Geschichte                                  | 353 |
| 5.2.6 Die römische Geschichte                                     | 363 |
| 5.3 Die dunklen Zeiten der Geschichte                             | 377 |
| 5.3.1 Die früheste Geschichte                                     | 377 |
| 5.3.2 Indien                                                      | 395 |
| 5.3.3 Über das Ziel der Geschichte                                | 414 |
| <br><b>6. Die Sozietätsabhandlungen</b>                           | 421 |
| 6.1 Übersicht                                                     | 421 |
| 6.2 Mythologie und Religion                                       | 429 |
| 6.2.1 Der Ursprung von Mythen und Religionen                      | 431 |
| 6.2.2 Die Entstehung der griechischen Mythologie                  | 449 |
| 6.2.3 Die frühe Geschichte der griechischen Welt                  | 471 |
| 6.3 Die Etrusker                                                  | 497 |
| 6.4 Über die Quellen Diodors                                      | 531 |
| 6.5 Sparta                                                        | 551 |
| 6.6 Über die Kunst in Konstantinopel                              | 570 |
| <br><b>Schluß</b>                                                 | 581 |
| Heynes Schriften in chronologischer Anordnung                     | 585 |
| Literatur                                                         | 610 |
| Personenverzeichnis                                               | 640 |
